# Supplementary material for: Nivolumab for unresectable cutaneous epithelial malignancies: An open-label, single-arm, multi-centre, phase II trial (NMSC-PD1)
Source: Research Square preprint supplement (doi:10.21203/rs.3.rs-8709454/v1), 2026-02-04
Supplement: Supplementary file 1 [file 94a5cc1526039f6cee71ada4.pdf]

**Supplementary Table 1. TMB and MSI**

|                         | All (n = 23)    | SCC (n = 16)     | Non-SCC NMSC<br>(n = 7) |
|-------------------------|-----------------|------------------|-------------------------|
| TMB                     |                 |                  |                         |
| Median (range) (mut/Mb) | 9.0             | 9.0 (3.1–91.7)   | 8.6 (4.7–21.9)          |
| High*                   | 7 (30.4%)       | 5 (31.3%)        | 2 (28.6%)               |
| Low*                    | 16 (69.6%)      | 11 (68.7%)       | 5 (71.4%)               |
| MSI                     |                 |                  |                         |
| Median (range) (%)      | 2.7 (0.88–5.36) | 2.12 (0.88–5.15) | 2.97 (1.85–5.36)        |
| High**                  | 0 (0%)          | 0 (0%)           | 0 (0%)                  |
| Low**                   | 23 (100%)       | 16 (100%)        | 7 (100%)                |

\* cutoff 10mut/Mb, \*\* cutoff 20%

SCC, squamous cell carcinoma; NMSC, non-melanoma skin cancer; TMB, tumour mutational burden;  
MSI, microsatellite instability

**Supplementary Table 2. Subgroup analysis of response for each factor**

| Sub-group                 | N  | Response (%) | Non-response (%) | p-value |
|---------------------------|----|--------------|------------------|---------|
| SCC                       |    |              |                  |         |
| TMB (mut/Mb)              | 16 |              |                  |         |
| ≥10                       | 5  | 3 (60.0)     | 2 (40)           | 0.2445  |
| <10                       | 11 | 2 (18.2)     | 9 (87.5)         |         |
| Previous systemic therapy | 20 |              |                  |         |
| +                         | 4  | 1 (25.0)     | 3 (75.0)         | 1.0000  |
| -                         | 16 | 4 (25.0)     | 12 (75.0)        |         |
| Sun exposed areas         | 20 |              |                  |         |
| Exposed                   | 6  | 2 (33.3)     | 4 (66.7)         | 0.6126  |
| Non-exposed               | 14 | 3 (21.4)     | 11 (78.6)        |         |
| Age                       | 20 |              |                  |         |
| 70>                       | 10 | 3 (30.0)     | 7 (70.0)         | 1.0000  |
| 70≤                       | 10 | 2 (20.0)     | 8 (80.0)         |         |
| Sex                       | 20 |              |                  |         |
| male                      | 13 | 3 (23.1)     | 10 (76.9)        | 1.0000  |
| female                    | 7  | 2 (28.6)     | 5 (71.4)         |         |
| Non-SCC NMSC              |    |              |                  |         |
| TMB (mut/Mb)              | 7  |              |                  |         |
| ≥10                       | 2  | 0 (0)        | 2 (100)          | 0.5238  |
| <10                       | 5  | 2 (40.0)     | 3 (60.0)         |         |
| Previous systemic therapy | 11 |              |                  |         |
| +                         | 3  | 0 (0.0)      | 3 (100)          | 1.0000  |
| -                         | 8  | 2 (25.0)     | 6 (75.0)         |         |
| Sun exposed areas         | 20 |              |                  |         |
| Exposed                   | 2  | 0 (0)        | 2 (100)          | 1.0000  |
| Non-exposed               | 9  | 2 (22.2)     | 7 (77.8)         |         |

|                    |    |           |           |        |
|--------------------|----|-----------|-----------|--------|
| <b>Age</b>         | 11 |           |           |        |
| 70>                | 5  | 2 (0)     | 3 (100)   | 0.1818 |
| 70≤                | 6  | 0 (33.3)  | 6 (66.7)  |        |
| <b>Sex</b>         | 11 |           |           |        |
| male               | 8  | 2 (25.0)  | 6 (75.0)  | 1.0000 |
| female             | 3  | 0 (0)     | 3 (100)   |        |
| <b>Cancer type</b> | 31 |           |           |        |
| SCC                | 20 | 5 (25.0)  | 15 (75.0) | 1.0000 |
| Non-SCC            | 11 | 2 (18.2)) | 9 (81.8)  |        |

SCC, squamous cell carcinoma; TMB, tumor mutational burden; NMSC, non-melanoma skin cancer

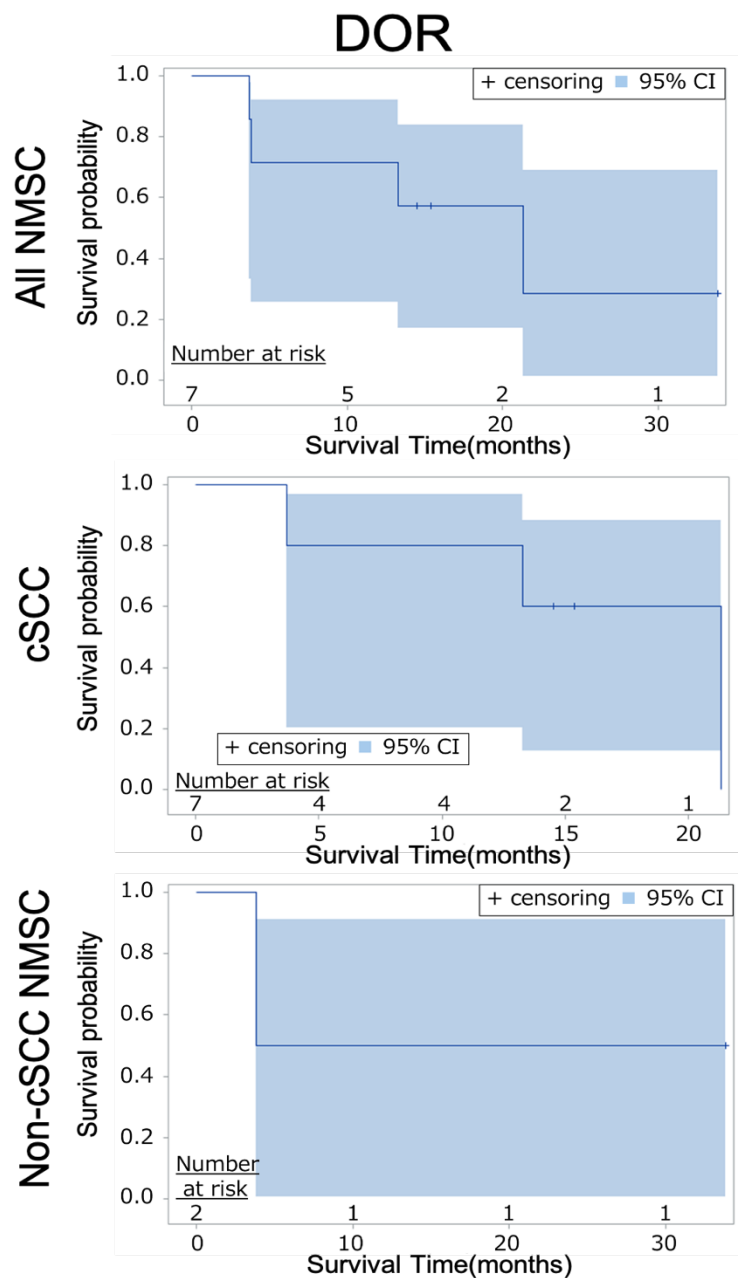

DOR, duration of response; NMSC, non-melanoma skin cancer; cSCC, cutaneous squamous cell carcinoma

#### Supplementary Figure 1

Kaplan–Meier curves show duration of response among responders (CR/PR) assessed by BICR in all NMSCs, cSCC, and non-cSCC NMSCs. Median DOR was **21.3 months** (95% CI, **3.7–NR**) for all NMSCs, **21.3 months** (95% CI, **3.7–NR**) for cSCC, and **NR** (95% CI, **3.8–NR**) for non-cSCC NMSCs. Tick marks indicate censored observations. DOR was defined as the time from the first documented response to disease progression or death.
